# Supplementary material for: MAPK p38alpha Kinase Influences Haematopoiesis in Embryonic Stem Cells
Source: Hindawi journal article supplement (doi:10.1155/2019/5128135), 2019-06-02
Supplement: f1 [file 5128135.f1.pdf]

## Supplements

### Supp. 1

Suggested scheme of hematopoiesis both *in vivo* (a) [1, 2, 3] and in *in vitro* model of ES cells differentiation (b) [4, 5] in mice. The scheme of potential role of p38 kinase in hematopoiesis based on previous published results and observed in our work (c). VEGF induces expression of Etv2 in p38 kinase-dependent manner, what leads to hemangioblast formation and development. EPO/EpoR induced activation of p38 kinase and phosphorylation (green arrow) of its targets GATA1 and 2, which transcriptional activity is required for erythropoiesis. Hematopoiesis in our experiments with ES cells. The capability forming hematopoietic colony forming unit (CFU) progenitors (d), CFU-G, -GM, -M, -E, and -GEMM in differentiating wt ES cells (e). The expression of hematopoiesis specific transcripts in our model of *in vitro* hematopoiesis in wt ES cells (f). For details, see Materials and Methods, and Results in our manuscript.

### Supp. 2

Mutated p38 $\alpha$ <sup>-/-</sup> cells did not express p38 $\alpha$  protein, in contrast to their wt counterparts. The expression of key pluripotent protein Oct4 and general abundant GAPDH was equal in both cell lines (a). When cells were differentiated by means of EB techniques, the overall level of p38 $\alpha$  kinase RNA did not change (b). The level of p38 $\alpha$  kinase protein as well as its phosphorylated form were also unchanged. This was in contrast to the level of Oct4 protein, a marker of undifferentiated pluripotent cells, that decreased continuously with differentiation time. The protein level of GAPDH, which was used as a reference gene, is also shown (c). The phosphorylated form of p38 $\alpha$  kinase when wt cells were treated by inhibitors of p38 kinase pathway SB203580 or SB202190 (5 $\mu$ M) for 1 hour and subsequently by 200  $\mu$ M H<sub>2</sub>O<sub>2</sub> for 1 hour (d). Data are presented as representative western blot from two experiments, RNA level as mean + SEM from four independent experiments.



|             |   |   |   |   |   |   |   |   |   |
|-------------|---|---|---|---|---|---|---|---|---|
| HoxB4       | - | - | - | - | - | - | - | - | - |
| GATA1       | ↓ | ↓ | ↓ | ↓ | ↓ | ↓ | ↓ | ↓ | ↓ |
| GATA2       | - | - | - | - | - | - | ↓ | ↓ | ↓ |
| Klf1        | - | - | - | ↓ | ↓ | ↓ | ↓ | ↓ | ↓ |
| PU.1        | - | - | - | - | ↓ | - | ↓ | ↓ | ↓ |
| Runx1       | - | - | - | - | - | - | ↓ | ↓ | ↓ |
| <b>Sca1</b> | ↑ | ↓ | ↓ | ↑ | ↓ | ↓ | - | - | - |
| VEGF        | - | - | - | - | - | - | - | ↓ | ↓ |

## References

1. T.L. Huber, V. Kouskoff, H.J. Fehling, J. Palis, and G. Keller, "Haemangioblast commitment is initiated in the primitive streak of the mouse embryo." *Nature*. vol. 432, no. 7017, pp. 625–630, 2004.
2. A. Medvinsky, S. Rybtsov, and S. Taoudi, "Embryonic origin of the adult hematopoietic system: advances and questions." *Development*. vol. 138, no. 6, pp. 1017–1031, 2011.
3. T.C. Doetschman, H. Eistetter, M. Katz, W. Schmidt, and R. Kemler, "The in vitro development of blastocyst-derived embryonic stem cell lines: formation of visceral yolk sac, blood islands and myocardium." *J. Embryol. Exp. Morphol.* vol. 87, pp. 27–45, 1985.
4. G. Keller, M. Kennedy, T. Papayannopoulou, and M. V Wiles, "Hematopoietic commitment during embryonic stem cell differentiation in culture." *Mol. Cell. Biol.* vol. 13, no. 1, pp. 473–486, 1993.
5. M. V Wiles and G. Keller, "Multiple hematopoietic lineages develop from embryonic stem (ES) cells in culture." *Development*. vol. 111, no. 2, pp. 259–267, 1991.

Supplement 1.

*In vivo*

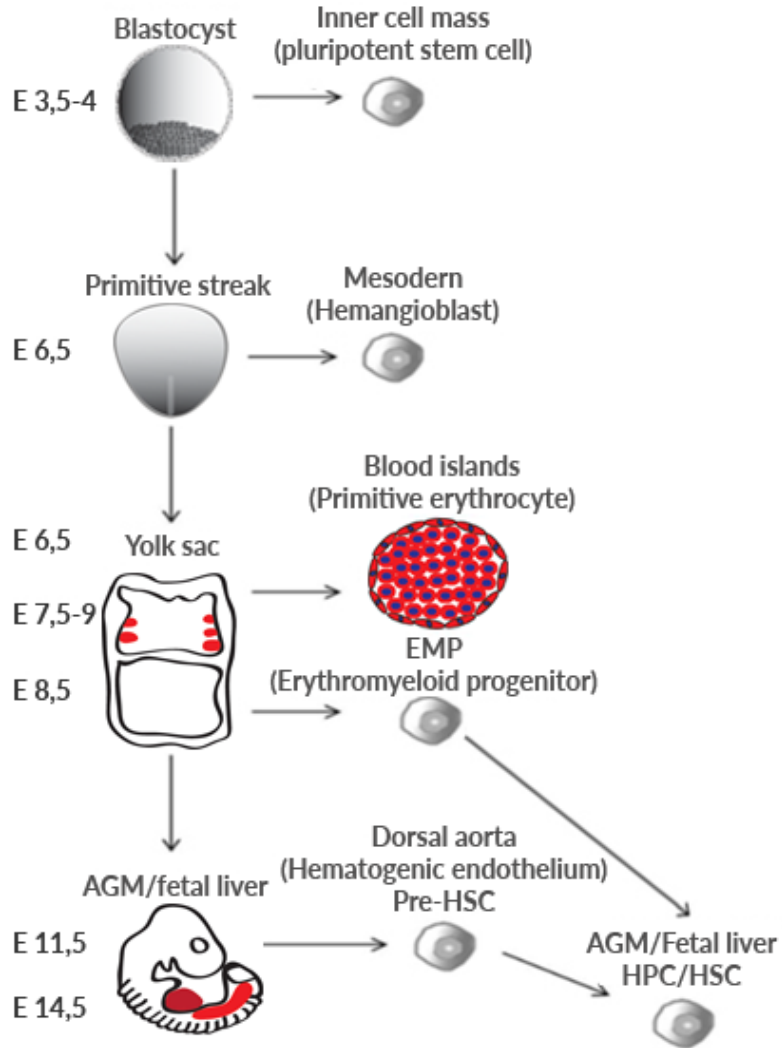

(a)

*In vitro*

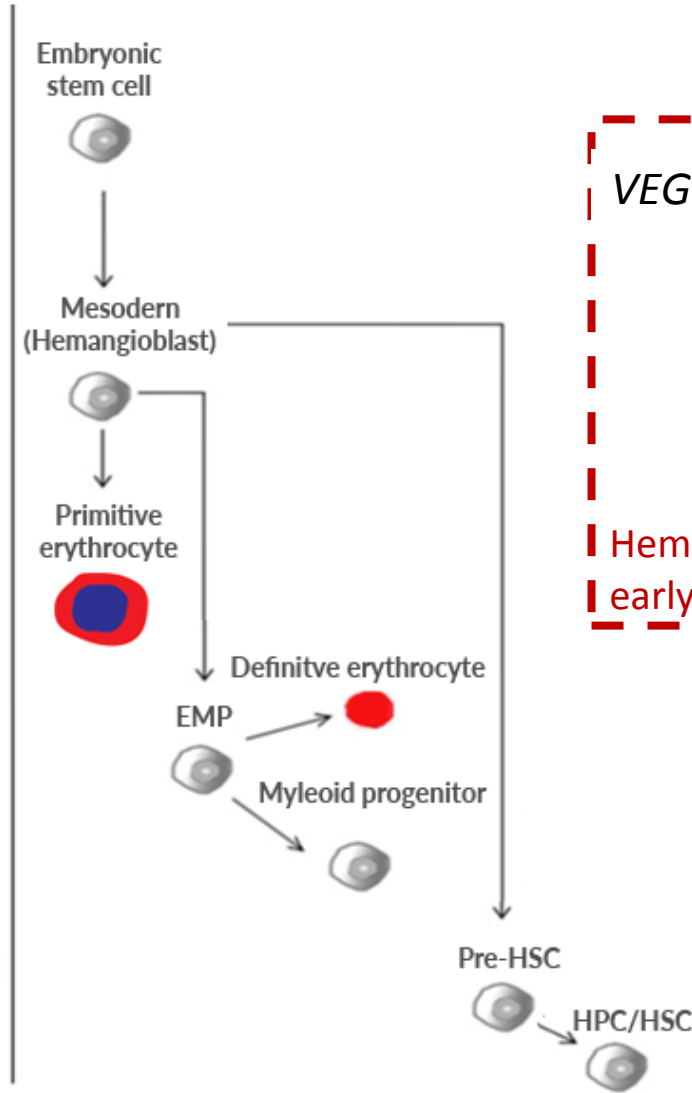

(b)

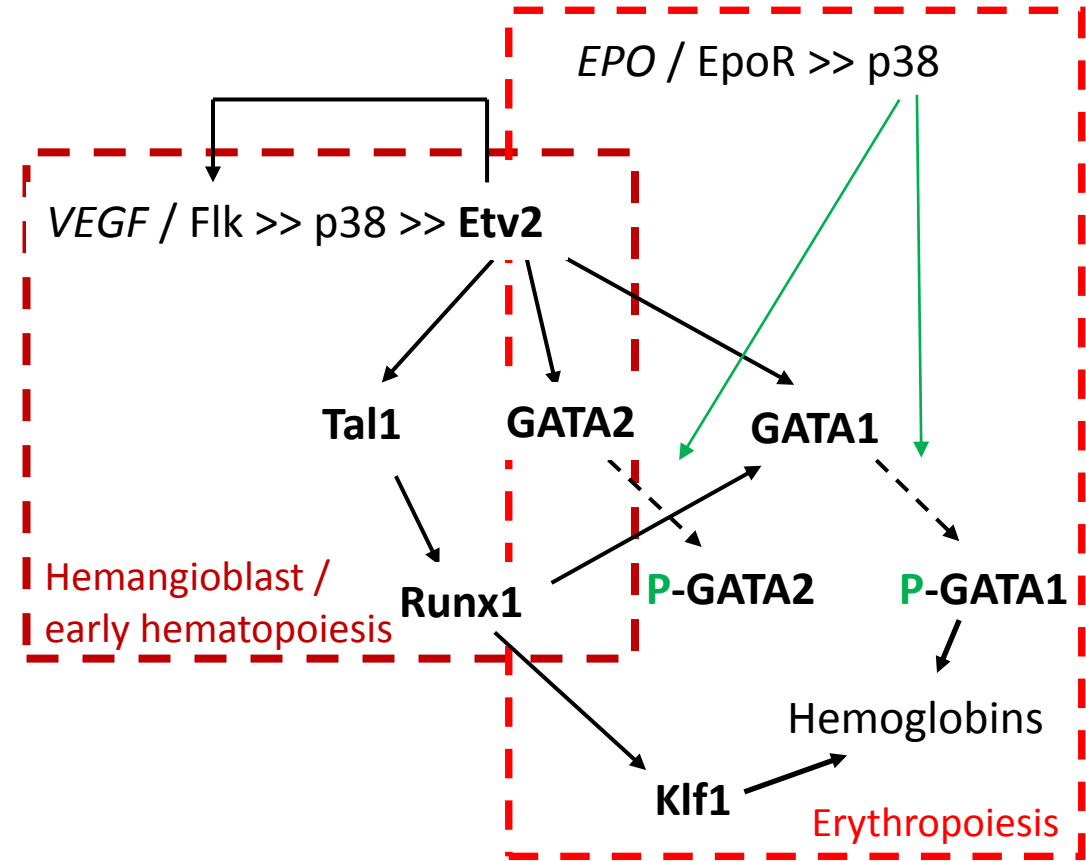

(c)

Supplement 1.

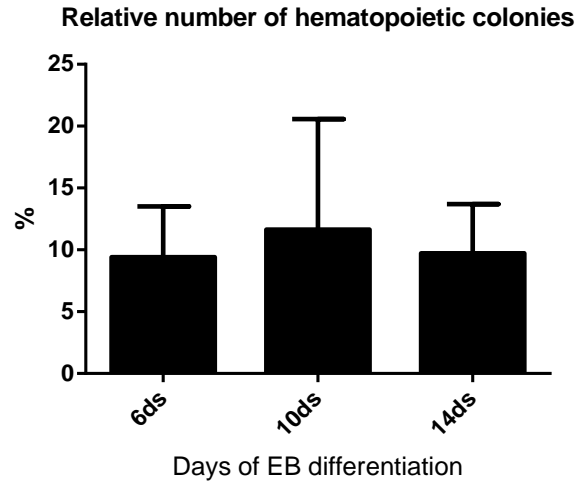

(d)

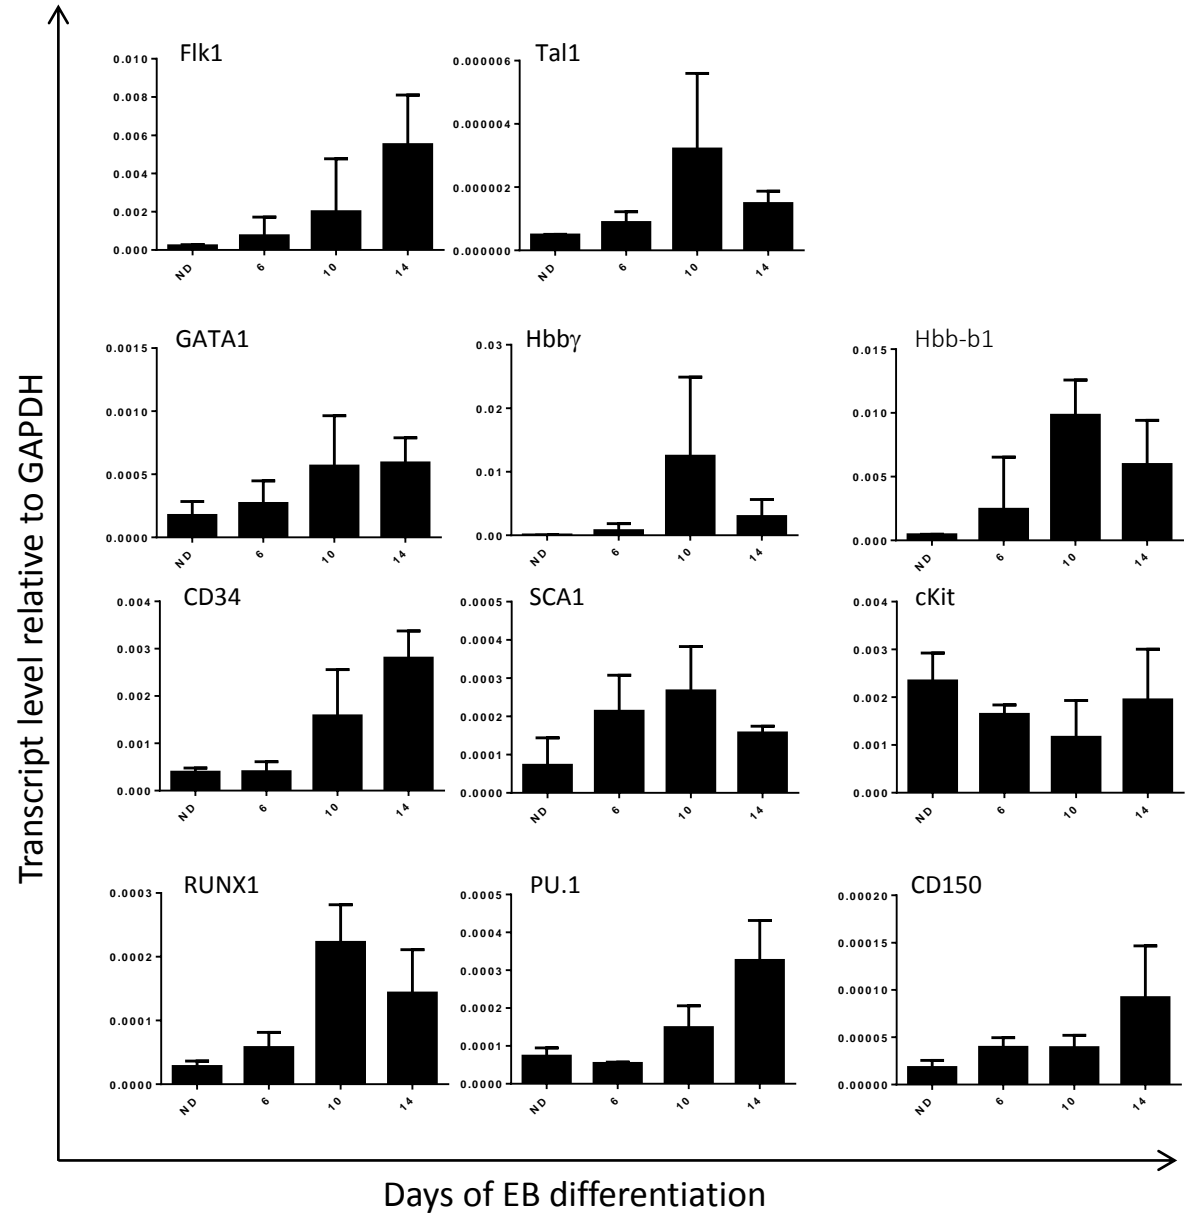

(f)

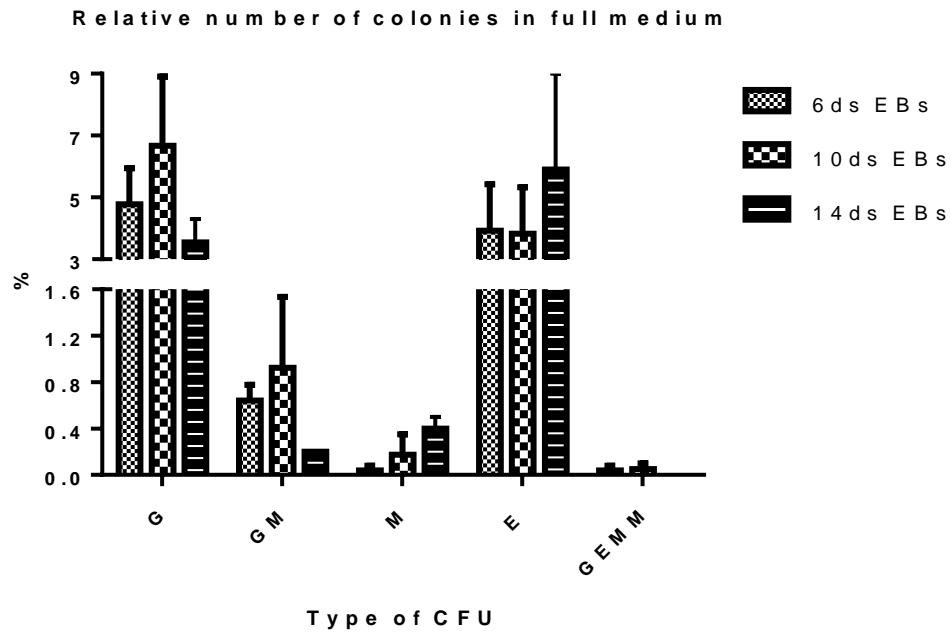

(e)

Supplement 2.

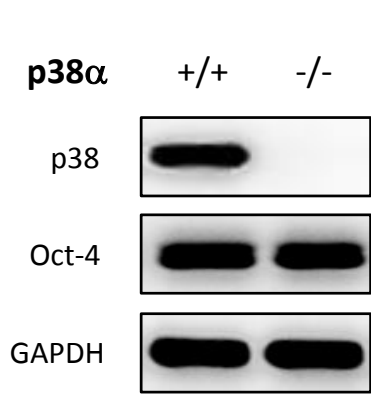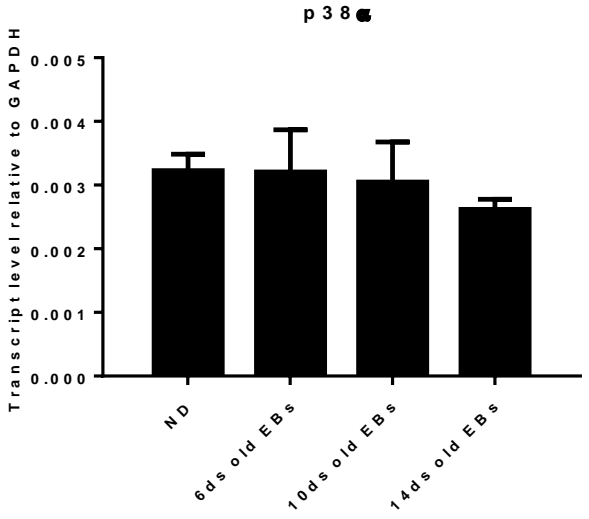

(a)

(b)

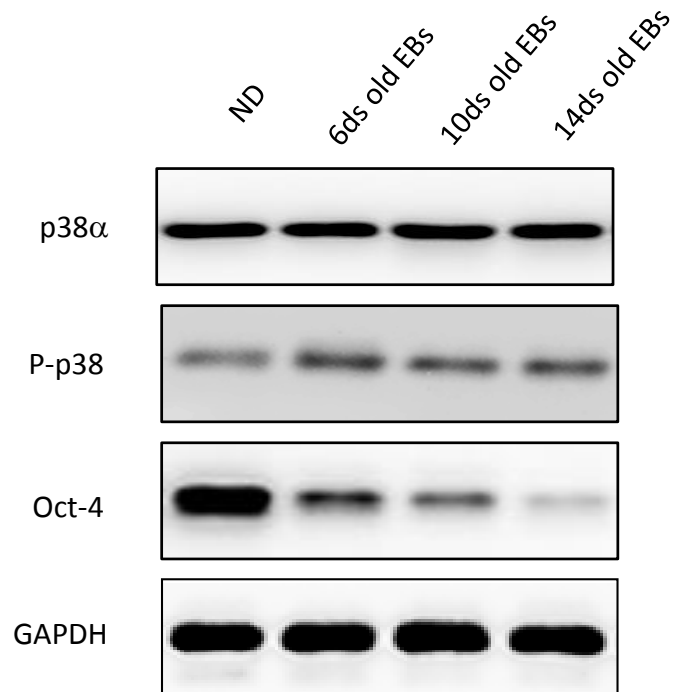

(c)

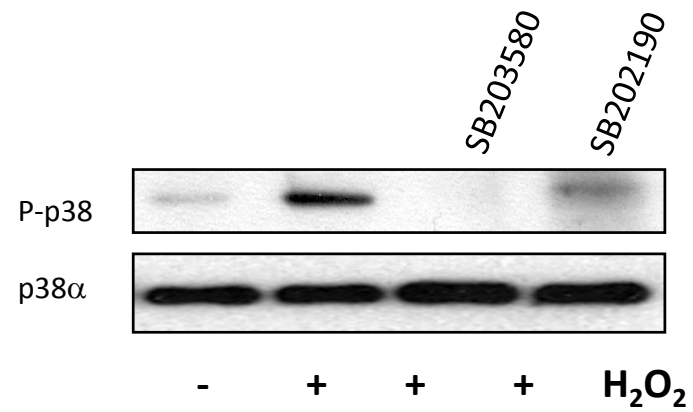

(d)

Supplement 3.

Hematopoietic colonies

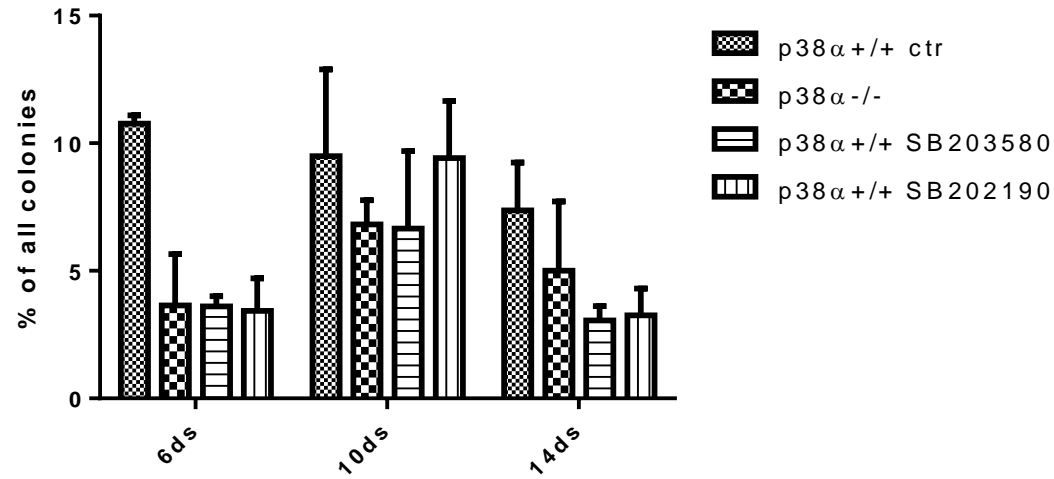

Relative number of colonies in full medium (6ds old EBs)

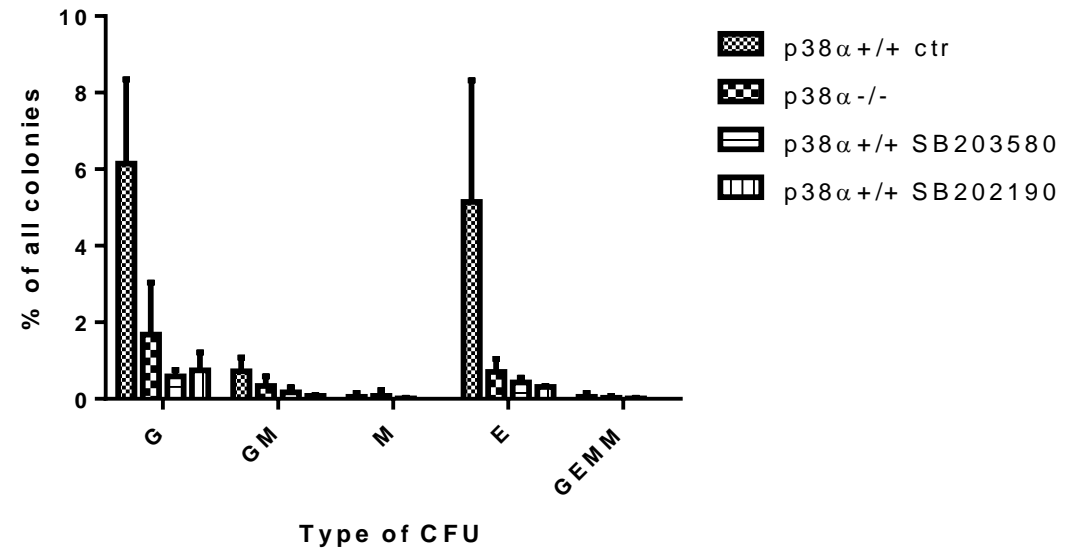

Relative number of colonies in full medium (10ds old EBs)

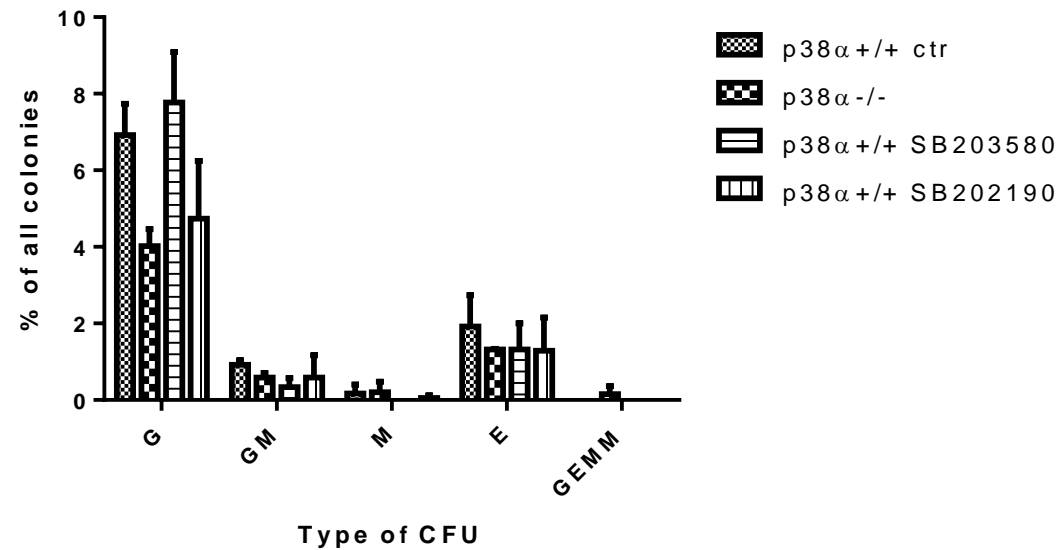

Relative number of colonies in full medium (14ds old EBs)

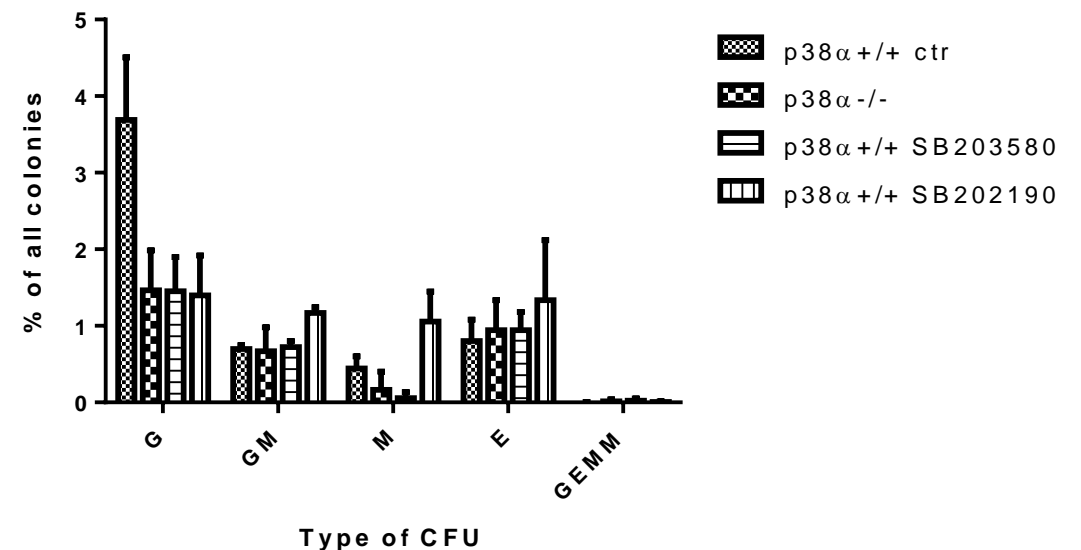

(a)

Supplement 3.

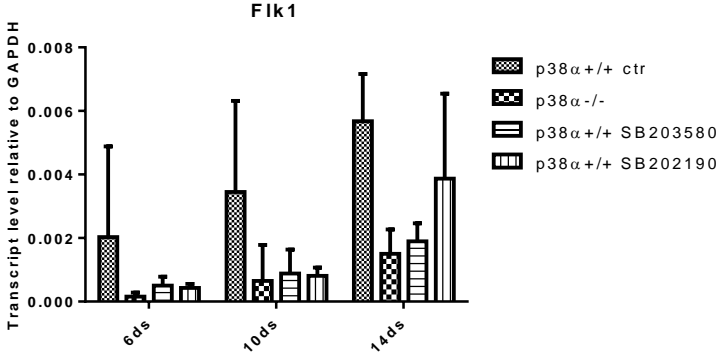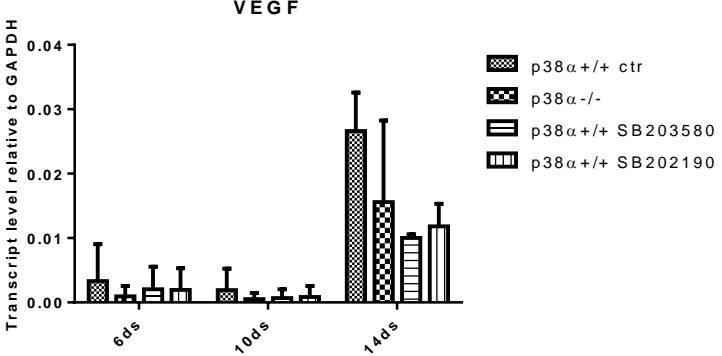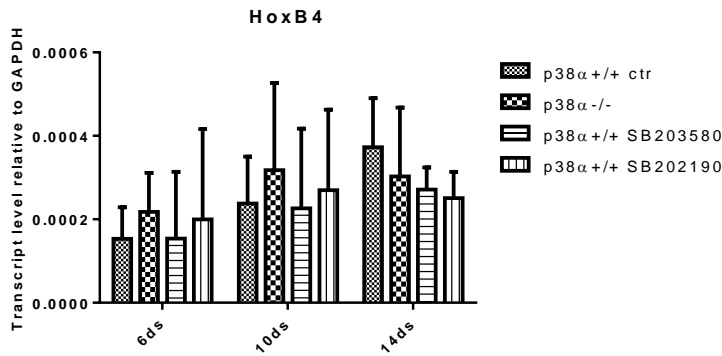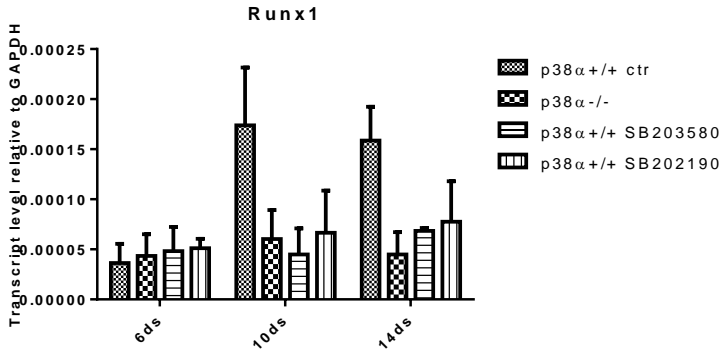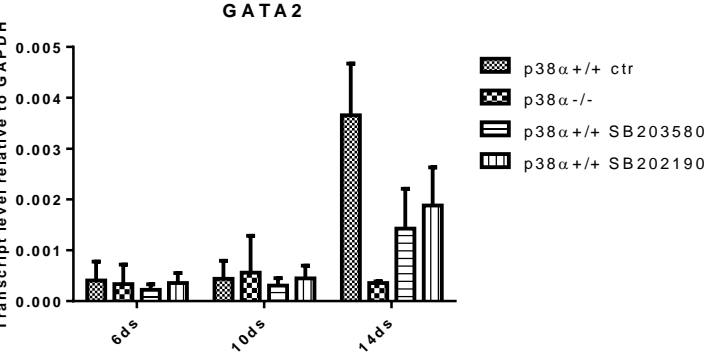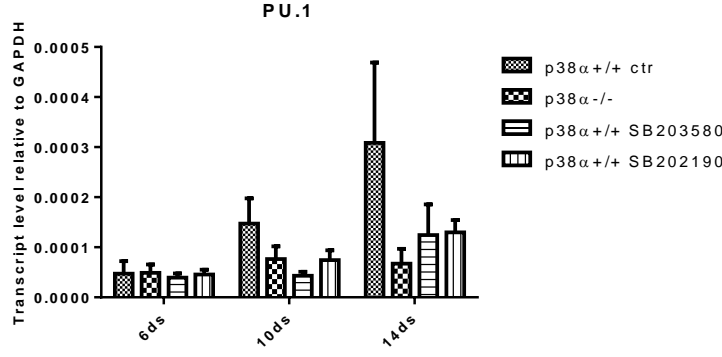

(b)



Supplement 3.

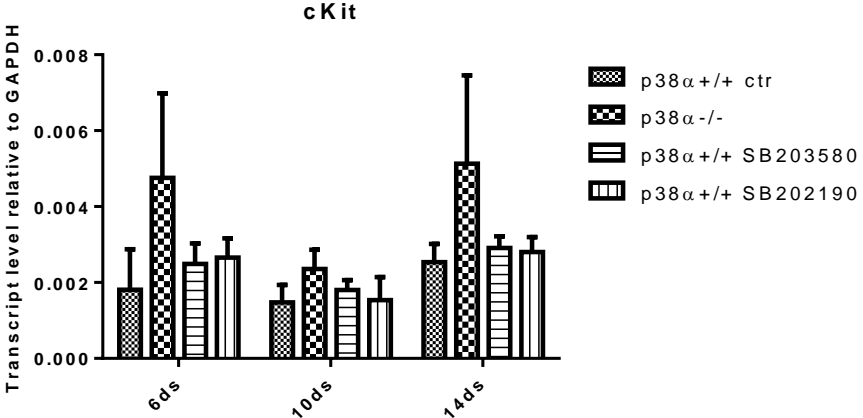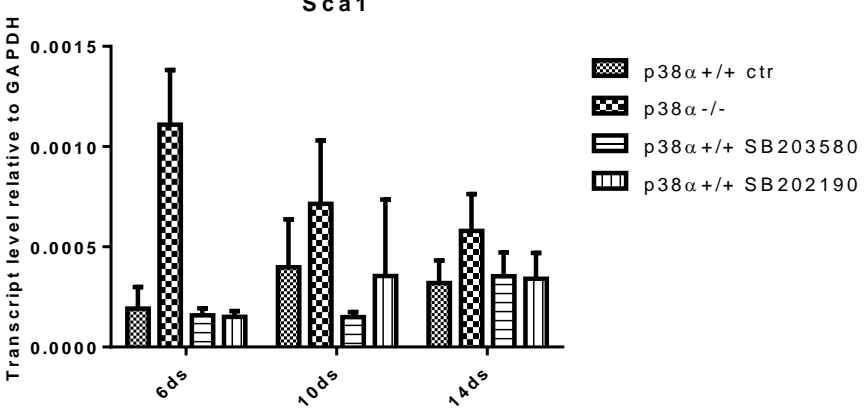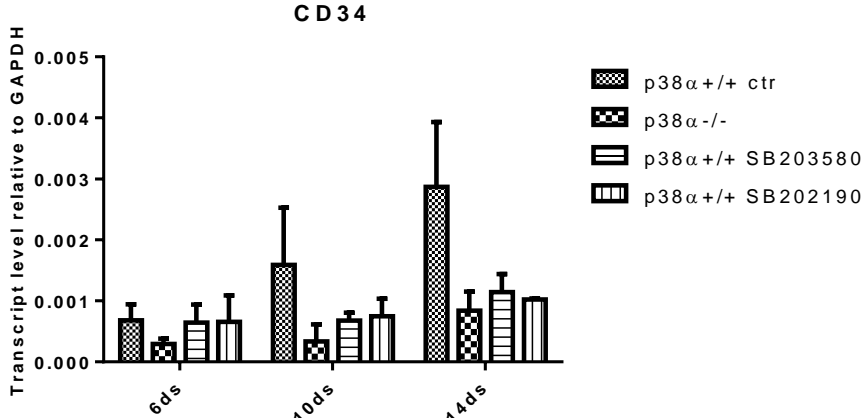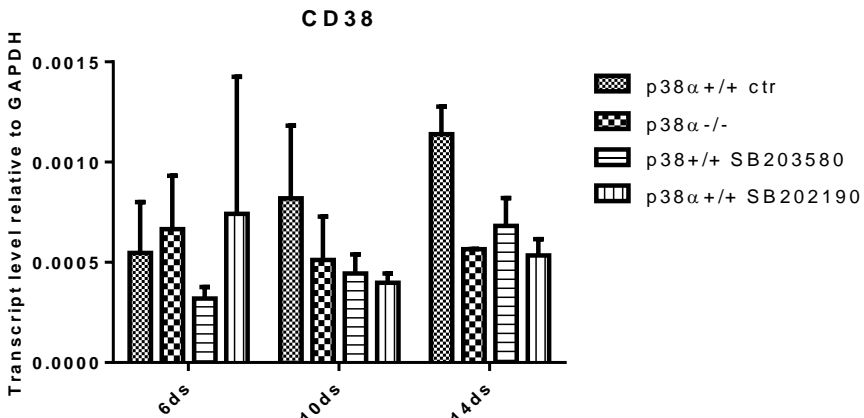

Supplement 3.

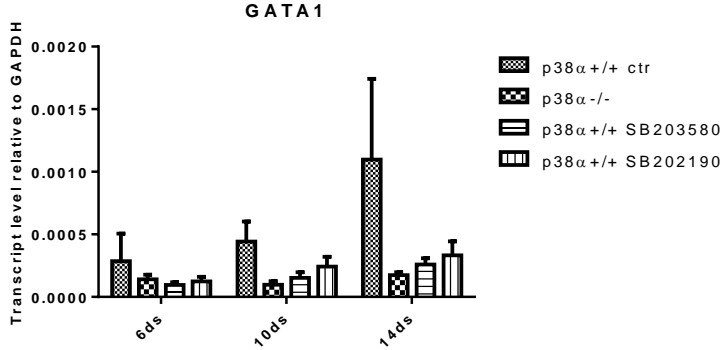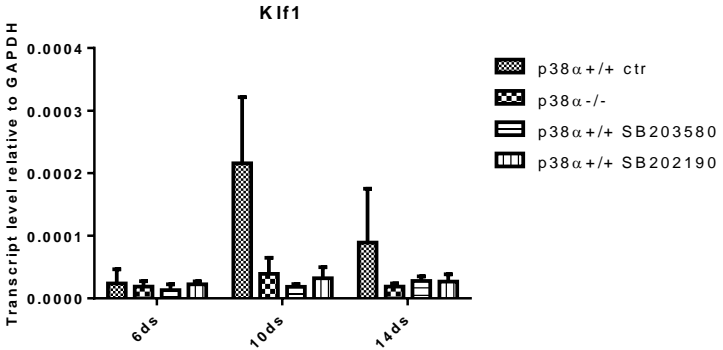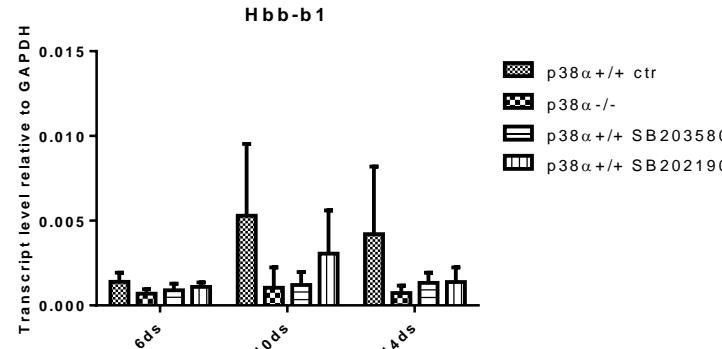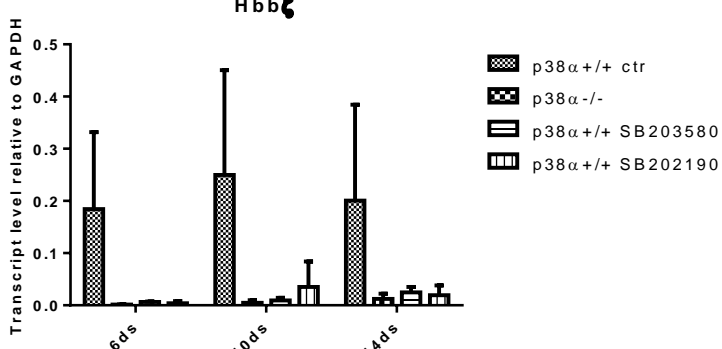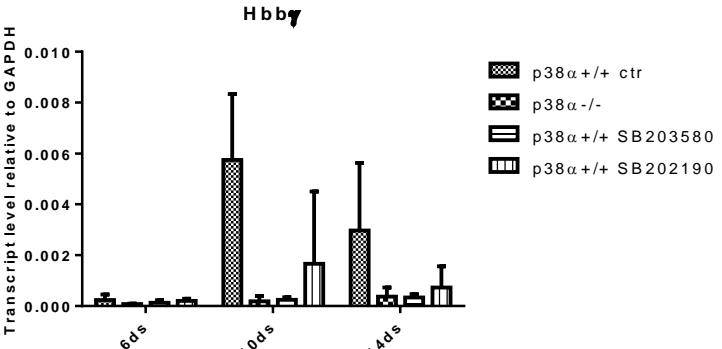

(d)
